# Supplementary material for: Targeting the CXCR4 pathway using a novel anti-CXCR4 IgG1 antibody (PF-06747143) in chronic lymphocytic leukemia
Source: PubMed Central journal article supplement (PMC5438492; doi:10.1186/s13045-017-0435-x), 2017-05-19

Supplementary Figure 2.

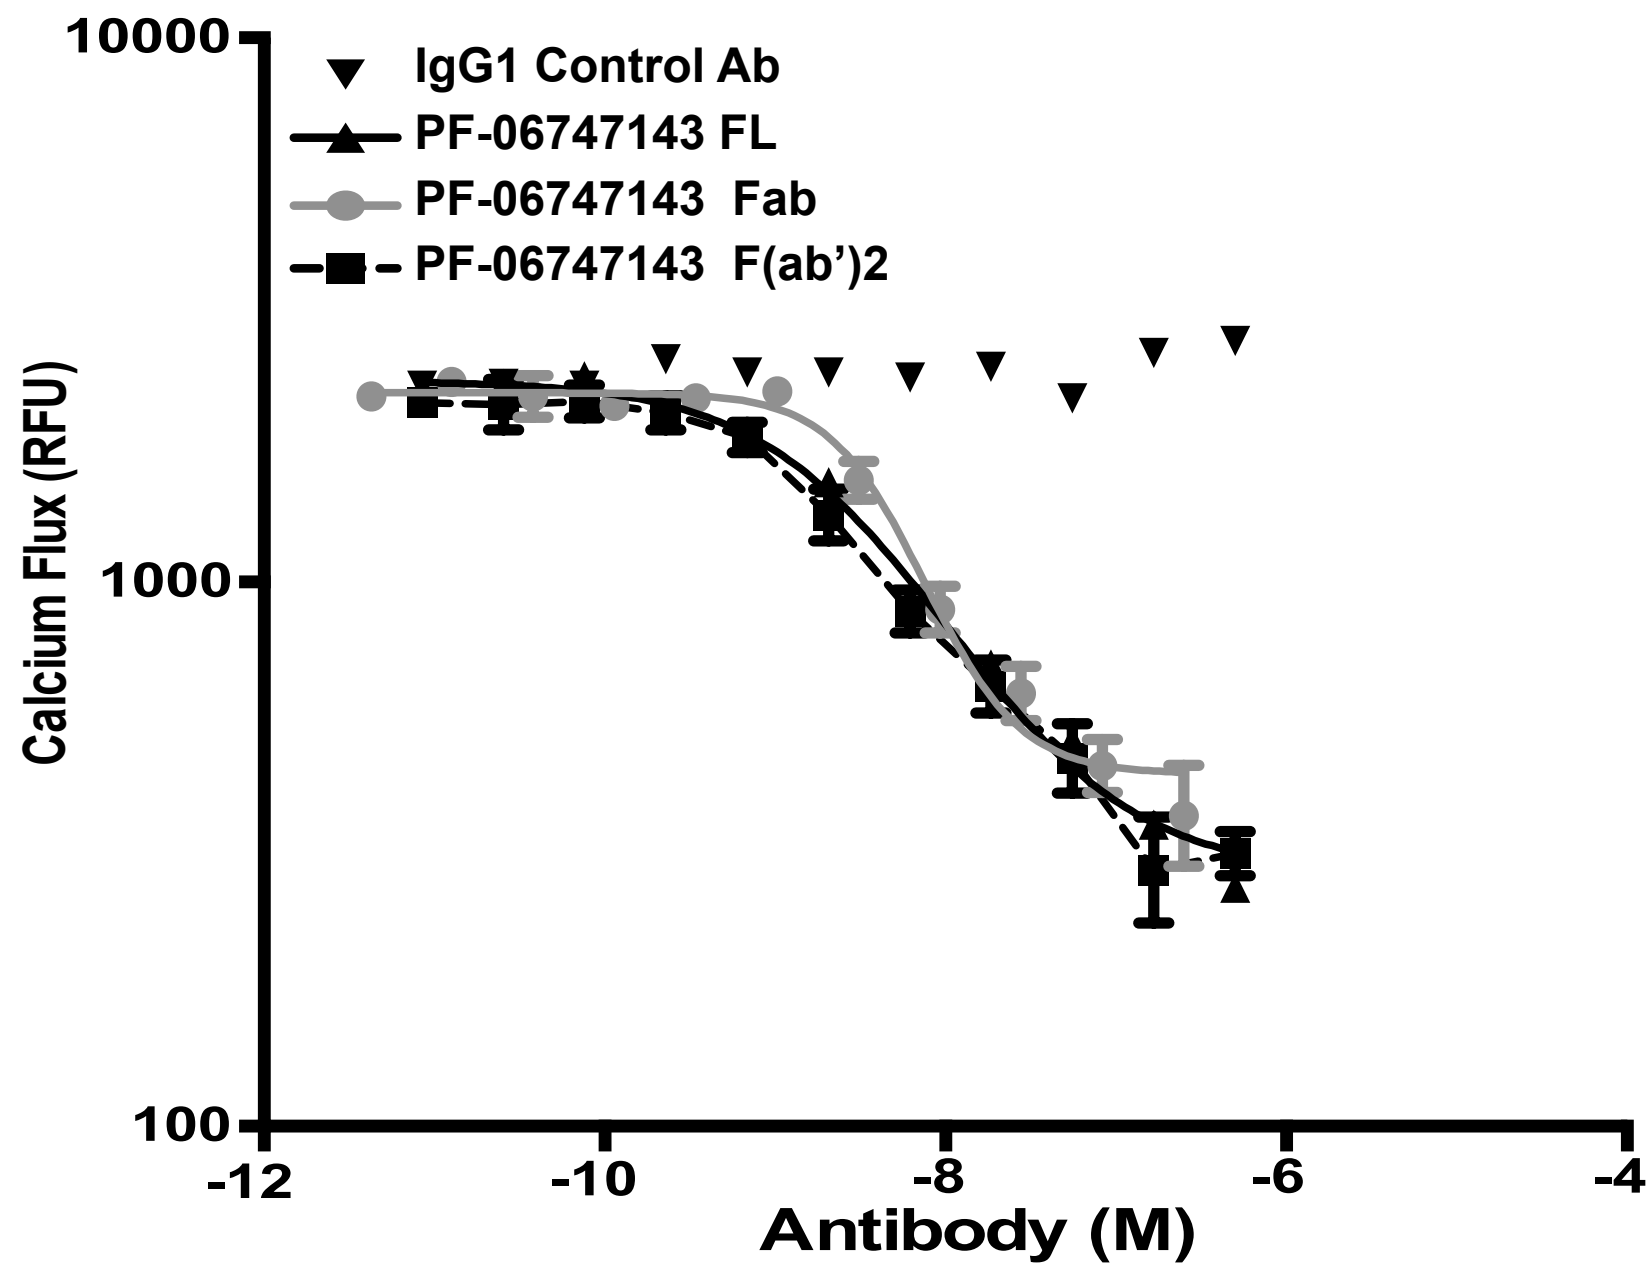

Supplement: 13045_2017_435_MOESM2_ESM.pdf [file 13045_2017_435_MOESM2_ESM.pdf]
