# Supplementary material for: Targeting the CXCR4 pathway using a novel anti-CXCR4 IgG1 antibody (PF-06747143) in chronic lymphocytic leukemia
Source: PubMed Central journal article supplement (PMC5438492; doi:10.1186/s13045-017-0435-x), 2017-05-19
Supplement: 13045_2017_435_MOESM3_ESM.pdf [file 13045_2017_435_MOESM3_ESM.pdf]

Supplementary Figure 3.

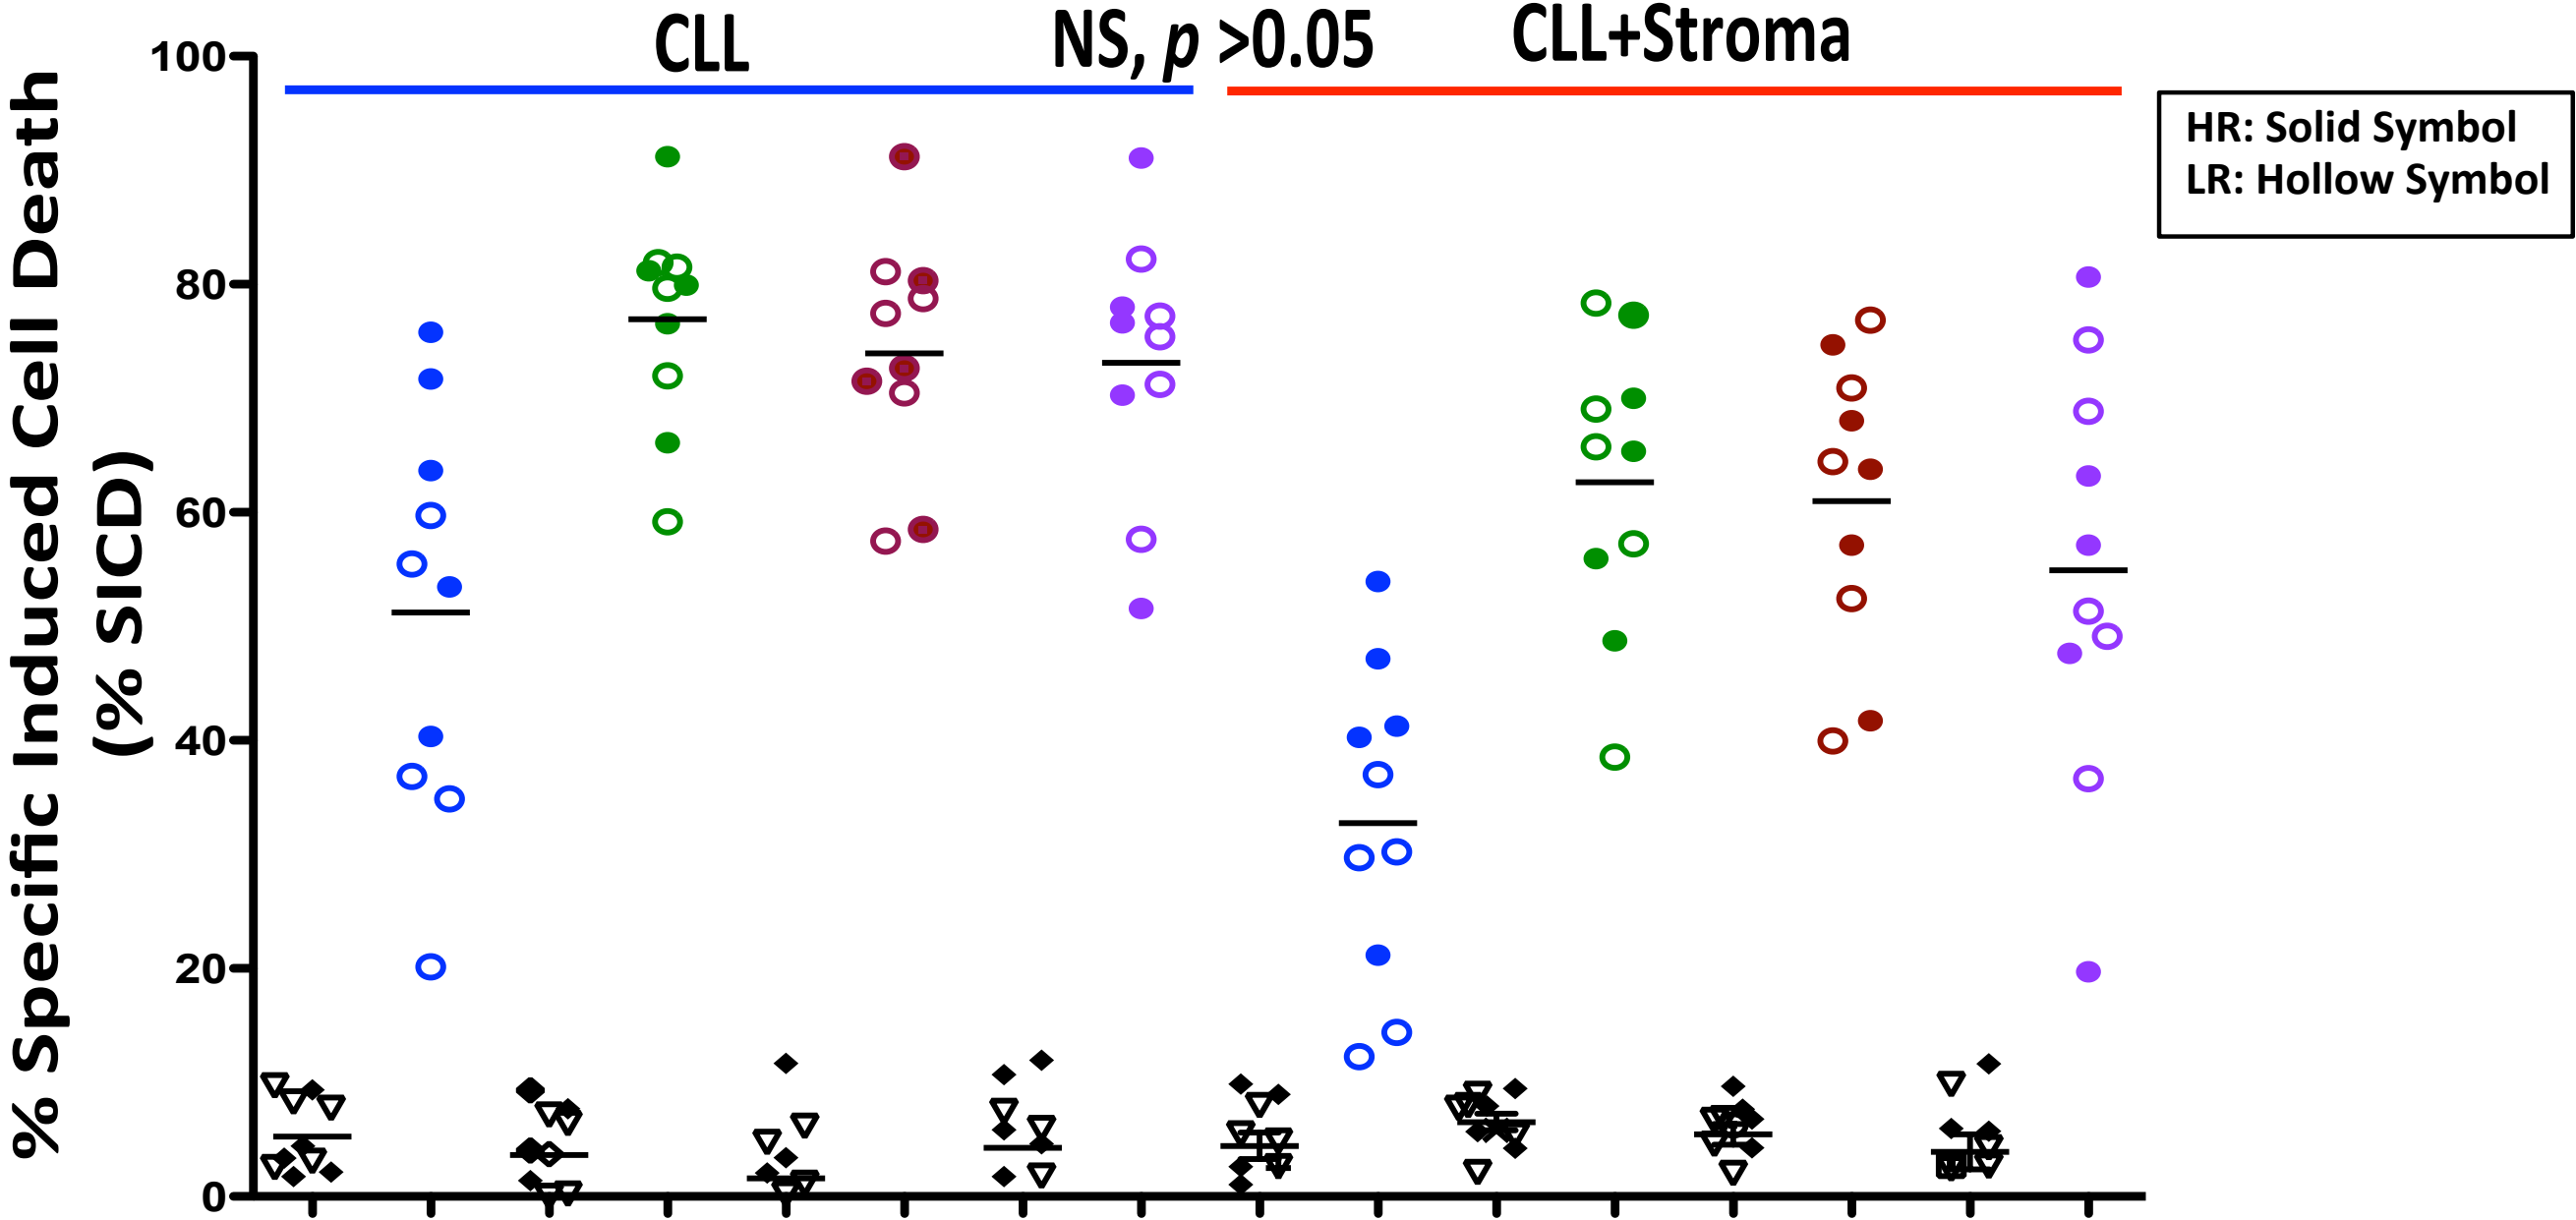

| Antibody Concentration (nM) | 1 |   | 10 |   | 100 |   | 1000 |   | 1 |   | 10 |   | 100 |   | 1000 |   |
|-----------------------------|---|---|----|---|-----|---|------|---|---|---|----|---|-----|---|------|---|
| CLL B Cells                 | + | + | +  | + | +   | + | +    | + | + | + | +  | + | +   | + | +    | + |
| IgG1 Control Ab             | + | - | +  | - | +   | - | +    | - | + | - | +  | - | +   | - | +    | - |
| m15-IgG1 Ab                 | - | + | -  | + | -   | + | -    | + | - | + | -  | + | -   | + | -    | + |
| Stromal Cells               | - | - | -  | - | -   | - | -    | - | + | + | +  | + | +   | + | +    | + |
