# Supplementary material for: Targeting the CXCR4 pathway using a novel anti-CXCR4 IgG1 antibody (PF-06747143) in chronic lymphocytic leukemia
Source: PubMed Central journal article supplement (PMC5438492; doi:10.1186/s13045-017-0435-x), 2017-05-19
Supplement: 13045_2017_435_MOESM6_ESM.pdf [file 13045_2017_435_MOESM6_ESM.pdf]

# Supplementary Figure 6.

**A. Caspase-3**

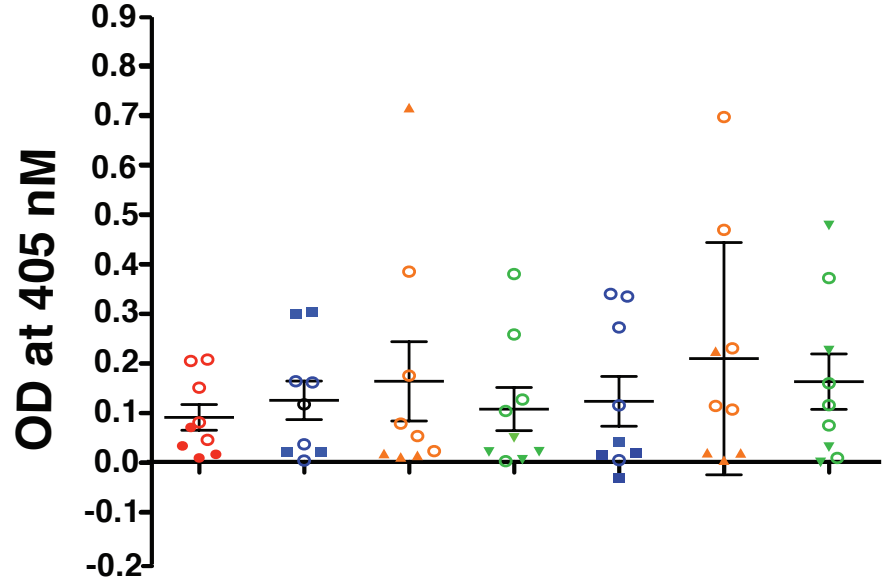

|                      |   |   |    |     |   |    |     |
|----------------------|---|---|----|-----|---|----|-----|
| IgG1 Control Ab (nM) | - | 1 | 10 | 100 | + | +  | +   |
| PF-06747143          | - | + | +  | +   | 1 | 10 | 100 |

**B. Caspase-8**

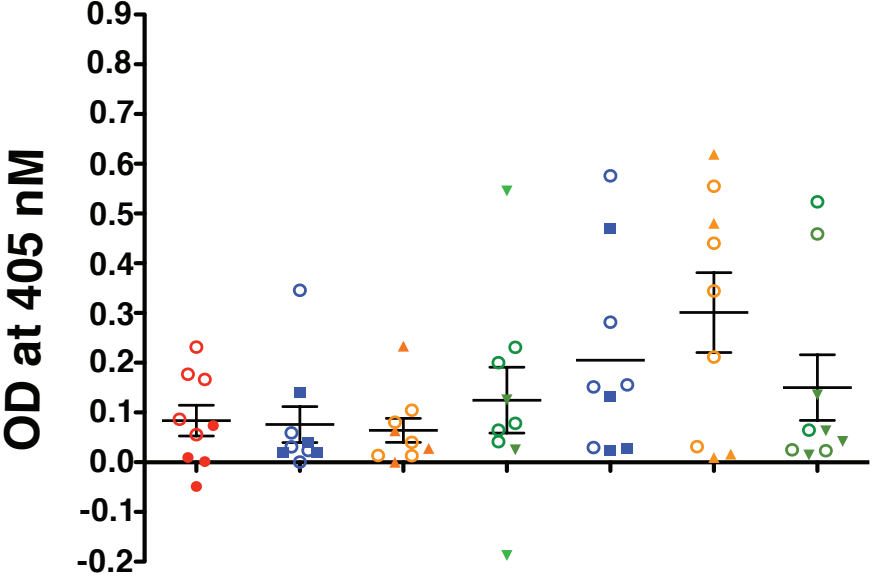

|                      |   |   |    |     |   |    |     |
|----------------------|---|---|----|-----|---|----|-----|
| IgG1 Control Ab (nM) | - | 1 | 10 | 100 | + | +  | +   |
| PF-06747143          | - | + | +  | +   | 1 | 10 | 100 |

**C. Caspase-9**

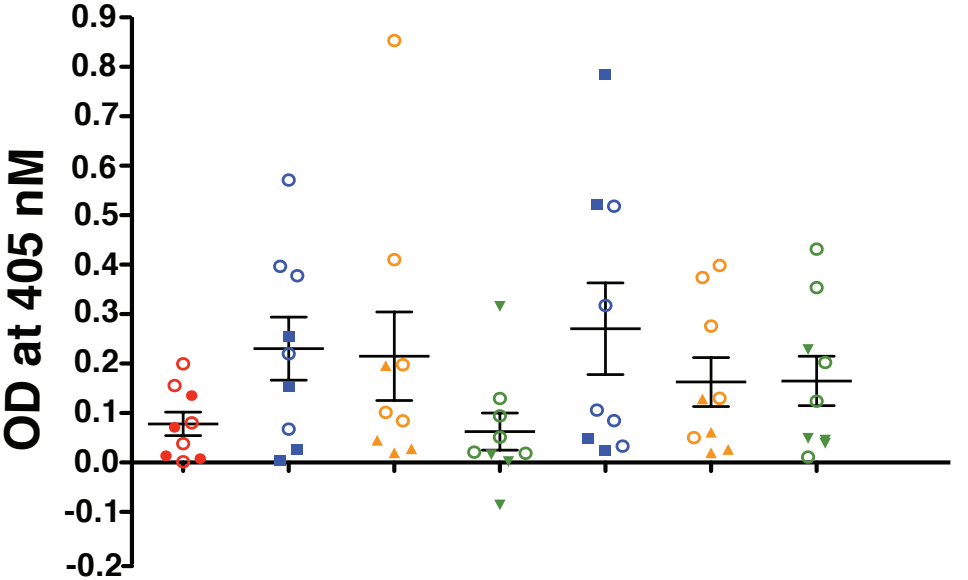

|                      |   |   |    |     |   |    |     |
|----------------------|---|---|----|-----|---|----|-----|
| IgG1 Control Ab (nM) | - | 1 | 10 | 100 | + | +  | +   |
| PF-06747143          | - | + | +  | +   | 1 | 10 | 100 |
